# Supplementary material for: Efficacy and adverse effects of peripheral nerve blocks and local infiltration anesthesia after arthroscopic shoulder surgery: A Bayesian network meta-analysis
Source: Frontiers journal article supplement (doi:10.3389/fmed.2022.1032253), 2022-11-10
Supplement: Data_Sheet_1.PDF [file Data_Sheet_1.PDF]

**The confidence in MD for efficacy at prophylaxis by GRADE system.**

| Comparison    | Study limitation | Imprecision                                                      | Inconsistency | Indirectness                                                            | Publication bias                                                                                                                          | GRADE    |
|---------------|------------------|------------------------------------------------------------------|---------------|-------------------------------------------------------------------------|-------------------------------------------------------------------------------------------------------------------------------------------|----------|
| CISB vs. CG   | No downgrade     | Upgrade due to large effect, MD= -3.14<br>95%CrI: -4.47 to -1.82 | No downgrade  | The overall effect was significantly based on the primary outcome.      | Undetectable by routine method.<br>The comparison-adjusted funnel plot for the network is not suggestive of any dominant publication bias | Moderate |
| ISB vs. CG    | No downgrade     | Upgrade due to large effect, MD= -2.41<br>95%CrI: -3.40 to -1.4  | No downgrade  | The overall effect was significantly based on the primary outcome.      | Undetectable by routine method.<br>The comparison-adjusted funnel plot for the network is not suggestive of any dominant publication bias | Moderate |
| SCB vs. CG    | No downgrade     | Upgrade due to large effect, MD= -2.34<br>95%CrI: -3.79 to -0.88 | No downgrade  | The overall effect was significantly based on the primary outcome.      | Undetectable by routine method.<br>The comparison-adjusted funnel plot for the network is not suggestive of any dominant publication bias | Moderate |
| SSNB vs. CG   | No downgrade     | No downgrade, MD=-1.66<br>95%CrI: -2.73 to -0.59                 | No downgrade  | The overall effect was significantly based on the primary outcome.      | Undetectable by routine method.<br>The comparison-adjusted funnel plot for the network is not suggestive of any dominant publication bias | Low      |
| SSAX vs. CG   | No downgrade     | No downgrade, MD= -1.63<br>95%CrI: -2.86 to -0.39                | No downgrade  | The overall effect was significantly based on the primary outcome.      | Undetectable by routine method.<br>The comparison-adjusted funnel plot for the network is not suggestive of any dominant publication bias | Low      |
| LIA vs. CG    | No downgrade     | No downgrade, MD= -1.30<br>95%CrI: -3.01 to 0.43                 | No downgrade  | The treatment effect was not significantly based on the primary outcome | Undetectable by routine method.<br>The comparison-adjusted funnel plot for the network is not suggestive of any dominant publication bias | Low      |
| CISB vs. LIA  | No downgrade     | No downgrade, MD= -1.85<br>95%CrI: -3.46 to -0.26                | No downgrade  | The treatment effect was significantly based on the primary outcome     | Undetectable by routine method.<br>The comparison-adjusted funnel plot for the network is not suggestive of any dominant publication bias | Low      |
| ISB vs. LIA   | No downgrade     | No downgrade, MD= -1.11<br>95%CrI: -2.77 to 0.52                 | No downgrade  | The treatment effect was not significantly based on the primary outcome | Undetectable by routine method.<br>The comparison-adjusted funnel plot for the network is not suggestive of any dominant publication bias | Low      |
| SCB vs. LIA   | No downgrade     | No downgrade, MD= -1.04<br>95%CrI: -2.98 to 0.87                 | No downgrade  | The treatment effect was not significantly based on the primary outcome | Undetectable by routine method.<br>The comparison-adjusted funnel plot for the network is not suggestive of any dominant publication bias | Low      |
| SSNB vs. LIA  | No downgrade     | No downgrade, MD= -0.37<br>95%CrI: -2.11 to 1.36                 | No downgrade  | The treatment effect was not significantly based on the primary outcome | Undetectable by routine method.<br>The comparison-adjusted funnel plot for the network is not suggestive of any dominant publication bias | Low      |
| SSAX vs. LIA  | No downgrade     | No downgrade, MD= -0.33<br>95%CrI: -2.16 to 1.49                 | No downgrade  | The treatment effect was not significantly based on the primary outcome | Undetectable by routine method.<br>The comparison-adjusted funnel plot for the network is not suggestive of any dominant publication bias | Low      |
| CISB vs. SSAX | No downgrade     | No downgrade, MD= -1.52<br>95%CrI: -3.06 to 0.02                 | No downgrade  | The treatment effect was not significantly based on the primary outcome | Undetectable by routine method.<br>The comparison-adjusted funnel plot for the network is not suggestive of any dominant publication bias | Low      |
| ISB vs. SSAX  | No downgrade     | No downgrade, MD= -0.78<br>95%CrI: -1.65 to 0.08                 | No downgrade  | The treatment effect was not significantly based on the primary outcome | Undetectable by routine method.<br>The comparison-adjusted funnel plot for the network is not suggestive of any dominant publication bias | Low      |
| SCB vs. SSAX  | No downgrade     | No downgrade, MD= -0.71<br>95%CrI: -2.15 to 0.72                 | No downgrade  | The treatment effect was not significantly based on the primary outcome | Undetectable by routine method.<br>The comparison-adjusted funnel plot for the network is not suggestive of any dominant publication bias | Low      |

|               |              |                                                   |              |                                                                         |                                                                                                                                           |          |
|---------------|--------------|---------------------------------------------------|--------------|-------------------------------------------------------------------------|-------------------------------------------------------------------------------------------------------------------------------------------|----------|
| SSNB vs. SSAX | No downgrade | No downgrade, MD= -0.04<br>95%CrI: -1.08 to 0.99  | No downgrade | The treatment effect was not significantly based on the primary outcome | Undetectable by routine method.<br>The comparison-adjusted funnel plot for the network is not suggestive of any dominant publication bias | Low      |
| CISB vs. SSNB | No downgrade | No downgrade, MD= -1.48<br>95%CrI: -2.87 to -0.08 | No downgrade | The treatment effect was significantly based on the primary outcome     | Undetectable by routine method.<br>The comparison-adjusted funnel plot for the network is not suggestive of any dominant publication bias | Low      |
| ISB vs. SSNB  | No downgrade | No downgrade, MD= -0.74<br>95%CrI: -1.48 to -0.01 | No downgrade | The treatment effect was significantly based on the primary outcome     | Undetectable by routine method.<br>The comparison-adjusted funnel plot for the network is not suggestive of any dominant publication bias | Low      |
| SCB vs. SSNB  | No downgrade | No downgrade, MD= -0.68<br>95%CrI: -1.96 to 0.60  | No downgrade | The treatment effect was not significantly based on the primary outcome | Undetectable by routine method.<br>The comparison-adjusted funnel plot for the network is not suggestive of any dominant publication bias | Low      |
| CISB vs. SCB  | No downgrade | No downgrade, MD= -0.80<br>95%CrI: -2.38 to 0.77  | No downgrade | The treatment effect was not significantly based on the primary outcome | Undetectable by routine method.<br>The comparison-adjusted funnel plot for the network is not suggestive of any dominant publication bias | Low      |
| ISB vs. SCB   | No downgrade | No downgrade, MD= -0.07<br>95%CrI: -1.23 to 1.09  | No downgrade | The treatment effect was not significantly based on the primary outcome | Undetectable by routine method.<br>The comparison-adjusted funnel plot for the network is not suggestive of any dominant publication bias | Low      |
| CISB vs. ISB  | No downgrade | No downgrade, MD= -0.74<br>95%CrI: -2.06 to 0.59  | No downgrade | The treatment effect was not significantly based on the primary outcome | Undetectable by routine method.<br>The comparison-adjusted funnel plot for the network is not suggestive of any dominant publication bias | Low      |
| ISB vs. LIA   | No downgrade | No downgrade, MD= -2.02<br>95%CrI: -3.49 to -0.58 | No downgrade | The treatment effect was significantly based on the primary outcome     | Undetectable by routine method.<br>The comparison-adjusted funnel plot for the network is not suggestive of any dominant publication bias | Moderate |
| SCB vs. LIA   | No downgrade | No downgrade, MD= -2.02<br>95%CrI: -5.09 to 1.09  | No downgrade | The treatment effect was not significantly based on the primary outcome | Undetectable by routine method.<br>The comparison-adjusted funnel plot for the network is not suggestive of any dominant publication bias | Low      |
| SSNB vs. LIA  | No downgrade | No downgrade, MD= -1.21<br>95%CrI: -2.77 to 0.34  | No downgrade | The treatment effect was not significantly based on the primary outcome | Undetectable by routine method.<br>The comparison-adjusted funnel plot for the network is not suggestive of any dominant publication bias | Low      |
| CISB vs. LIA  | No downgrade | No downgrade, MD= -1.09<br>95%CrI: -4.10 to 1.89  | No downgrade | The treatment effect was not significantly based on the primary outcome | Undetectable by routine method.<br>The comparison-adjusted funnel plot for the network is not suggestive of any dominant publication bias | Low      |
| SSAX vs. LIA  | No downgrade | No downgrade, MD= -1.13<br>95%CrI: -2.93 to 0.65  | No downgrade | The treatment effect was not significantly based on the primary outcome | Undetectable by routine method.<br>The comparison-adjusted funnel plot for the network is not suggestive of any dominant publication bias | Low      |
| CG vs. LIA    | No downgrade | No downgrade, MD= -0.69<br>95%CrI: -2.23 to 0.84  | No downgrade | The treatment effect was not significantly based on the primary outcome | Undetectable by routine method.<br>The comparison-adjusted funnel plot for the network is not suggestive of any dominant publication bias | Low      |
| ISB vs. CG    | No downgrade | No downgrade, MD= -1.33<br>95%CrI: -2.60 to -0.07 | No downgrade | The treatment effect was not significantly based on the primary outcome | Undetectable by routine method.<br>The comparison-adjusted funnel plot for the network is not suggestive of any dominant publication bias | Low      |
| SCB vs. CG    | No downgrade | No downgrade, MD= -1.33<br>95%CrI: -4.33 to 1.69  | No downgrade | The treatment effect was not significantly based on the primary outcome | Undetectable by routine method.<br>The comparison-adjusted funnel plot for the network is not suggestive of any dominant publication bias | Low      |

|               |              |                                                                 |                                                                                             |                                                                         |                                                                                                                                        |          |
|---------------|--------------|-----------------------------------------------------------------|---------------------------------------------------------------------------------------------|-------------------------------------------------------------------------|----------------------------------------------------------------------------------------------------------------------------------------|----------|
| SSNB vs. CG   | No downgrade | No downgrade, MD= -0.52<br>95%CrI: -1.93 to 0.91                | Only one head-to-head study, and no heterogeneity. One direct comparison and no -node_x005f | The treatment effect was not significantly based on the primary outcome | Undetectable by routine method. The comparison-adjusted funnel plot for the network is not suggestive of any dominant publication bias | Low      |
| CISB vs. CG   | No downgrade | No downgrade, MD= -0.40<br>95%CrI: -2.99 to 2.16                | No downgrade                                                                                | The treatment effect was not significantly based on the primary outcome | Undetectable by routine method. The comparison-adjusted funnel plot for the network is not suggestive of any dominant publication bias | Low      |
| SSAX vs. CG   | No downgrade | No downgrade, MD= -0.44<br>95%CrI: -2.09 to 1.20                | No downgrade                                                                                | The treatment effect was not significantly based on the primary outcome | Undetectable by routine method. The comparison-adjusted funnel plot for the network is not suggestive of any dominant publication bias | Low      |
| ISB vs. SSAX  | No downgrade | No downgrade, MD= -0.89<br>95%CrI: -1.98 to 0.20                | No downgrade                                                                                | The treatment effect was not significantly based on the primary outcome | Undetectable by routine method. The comparison-adjusted funnel plot for the network is not suggestive of any dominant publication bias | Low      |
| SCB vs. SSAX  | No downgrade | No downgrade, MD= -0.89<br>95%CrI: -3.82 to 2.07                | No downgrade                                                                                | The treatment effect was not significantly based on the primary outcome | Undetectable by routine method. The comparison-adjusted funnel plot for the network is not suggestive of any dominant publication bias | Low      |
| SSNB vs. SSAX | No downgrade | No downgrade, MD= -0.08<br>95%CrI: -1.43 to 1.29                | No downgrade                                                                                | The treatment effect was not significantly based on the primary outcome | Undetectable by routine method. The comparison-adjusted funnel plot for the network is not suggestive of any dominant publication bias | Low      |
| CISB vs. SSAX | No downgrade | No downgrade, MD= 0.04<br>95%CrI: -3.01 to 3.09                 | No downgrade                                                                                | The treatment effect was not significantly based on the primary outcome | Undetectable by routine method. The comparison-adjusted funnel plot for the network is not suggestive of any dominant publication bias | Low      |
| ISB vs. CISB  | No downgrade | No downgrade, MD= -0.93<br>95%CrI: -3.80 to 1.95                | No downgrade                                                                                | The treatment effect was not significantly based on the primary outcome | Undetectable by routine method. The comparison-adjusted funnel plot for the network is not suggestive of any dominant publication bias | Low      |
| SCB vs. CISB  | No downgrade | No downgrade, MD= -0.93<br>95%CrI: -4.88 to 3.04                | No downgrade                                                                                | The treatment effect was not significantly based on the primary outcome | Undetectable by routine method. The comparison-adjusted funnel plot for the network is not suggestive of any dominant publication bias | Low      |
| SSNB vs. CISB | No downgrade | No downgrade, MD= -0.12<br>95%CrI: -3.05 to 2.83                | No downgrade                                                                                | The treatment effect was not significantly based on the primary outcome | Undetectable by routine method. The comparison-adjusted funnel plot for the network is not suggestive of any dominant publication bias | Low      |
| ISB vs. SSNB  | No downgrade | No downgrade, MD= -0.81<br>95%CrI: -1.81 to 0.17                | No downgrade                                                                                | The treatment effect was not significantly based on the primary outcome | Undetectable by routine method. The comparison-adjusted funnel plot for the network is not suggestive of any dominant publication bias | Low      |
| SCB vs. SSNB  | No downgrade | No downgrade, MD= -0.81<br>95%CrI: -3.71 to 2.09                | No downgrade                                                                                | The treatment effect was not significantly based on the primary outcome | Undetectable by routine method. The comparison-adjusted funnel plot for the network is not suggestive of any dominant publication bias | Low      |
| ISB vs. SCB   | No downgrade | No downgrade, MD= -0.01<br>95%CrI: -2.74 to 2.71                | No downgrade                                                                                | The treatment effect was not significantly based on the primary outcome | Undetectable by routine method. The comparison-adjusted funnel plot for the network is not suggestive of any dominant publication bias | Low      |
| ISB vs.CG     | No downgrade | Upgrade due to large effect, MD=-1.69<br>95%CrI: -2.54 to -0.88 | No downgrade                                                                                | The treatment effect was significantly based on the primary outcome     | Undetectable by routine method. The comparison-adjusted funnel plot for the network is not suggestive of any dominant publication bias | Moderate |
| SCB vs.CG     | No downgrade | Upgrade due to large effect, MD=-1.78<br>95%CrI: -3.33 to -0.24 | No downgrade                                                                                | The treatment effect was significantly based on the primary outcome     | Undetectable by routine method. The comparison-adjusted funnel plot for the network is not suggestive of any dominant publication bias | Moderate |

|              |              |                                                                 |                                                                                                |                                                                         |                                                                                                                                           |          |
|--------------|--------------|-----------------------------------------------------------------|------------------------------------------------------------------------------------------------|-------------------------------------------------------------------------|-------------------------------------------------------------------------------------------------------------------------------------------|----------|
| SSNB vs.CG   | No downgrade | Upgrade due to large effect, MD=-1.49<br>95%CrI: -2.37 to -0.63 | No downgrade                                                                                   | The treatment effect was significantly based on the primary outcome     | Undetectable by routine method.<br>The comparison-adjusted funnel plot for the network is not suggestive of any dominant publication bias | Moderate |
| CISB vs.CG   | No downgrade | Upgrade due to large effect, MD=-1.39<br>95%CrI: -2.50 to -0.29 | No downgrade                                                                                   | The treatment effect was significantly based on the primary outcome     | Undetectable by routine method.<br>The comparison-adjusted funnel plot for the network is not suggestive of any dominant publication bias | Moderate |
| LIA vs.CG    | No downgrade | No downgrade, MD=-1.18<br>95%CrI: -2.56 to 0.19                 | No downgrade                                                                                   | The treatment effect was not significantly based on the primary outcome | Undetectable by routine method.<br>The comparison-adjusted funnel plot for the network is not suggestive of any dominant publication bias | Low      |
| SSAX vs.CG   | No downgrade | No downgrade, MD= -0.84<br>95%CrI: -1.86 to 0.17                | No downgrade                                                                                   | The treatment effect was not significantly based on the primary outcome | Undetectable by routine method.<br>The comparison-adjusted funnel plot for the network is not suggestive of any dominant publication bias | Low      |
| CISB vs.CG   | No downgrade | No downgrade, MD=0.19<br>95%CrI: 0.10 to 0.37                   | No downgrade                                                                                   | The treatment effect was not significantly based on the primary outcome | Undetectable by routine method.<br>The comparison-adjusted funnel plot for the network is not suggestive of any dominant publication bias | Low      |
| ISB vs.SSAX  | No downgrade | No downgrade, MD=-0.86<br>95%CrI: -1.51 to -0.2                 | No downgrade                                                                                   | The treatment effect was not significantly based on the primary outcome | Undetectable by routine method.<br>The comparison-adjusted funnel plot for the network is not suggestive of any dominant publication bias | Low      |
| SCB vs.SSAX  | No downgrade | No downgrade, MD=-0.95<br>95%CrI: -2.40 to 0.53                 | No downgrade                                                                                   | The treatment effect was not significantly based on the primary outcome | Undetectable by routine method.<br>The comparison-adjusted funnel plot for the network is not suggestive of any dominant publication bias | Low      |
| SSNB vs.SSAX | No downgrade | No downgrade, MD=-0.66<br>95%CrI: -1.56 to 0.25                 | No downgrade                                                                                   | The treatment effect was not significantly based on the primary outcome | Undetectable by routine method.<br>The comparison-adjusted funnel plot for the network is not suggestive of any dominant publication bias | Low      |
| CISB vs.SSAX | No downgrade | No downgrade, MD=-0.55<br>95%CrI: -1.92 to 0.81                 | No downgrade                                                                                   | The treatment effect was not significantly based on the primary outcome | Undetectable by routine method.<br>The comparison-adjusted funnel plot for the network is not suggestive of any dominant publication bias | Low      |
| LIA vs.SSAX  | No downgrade | No downgrade, MD=-0.34<br>95%CrI: -1.88 to 1.20                 | Only one head-to-head study, and no heterogeneity.<br>One direct comparison and no -node_x005f | The treatment effect was not significantly based on the primary outcome | Undetectable by routine method.<br>The comparison-adjusted funnel plot for the network is not suggestive of any dominant publication bias | Low      |
| ISB vs.LIA   | No downgrade | No downgrade, MD=-0.89<br>95%CrI: -1.94 to 0.89                 | No downgrade                                                                                   | The treatment effect was not significantly based on the primary outcome | Undetectable by routine method.<br>The comparison-adjusted funnel plot for the network is not suggestive of any dominant publication bias | Low      |
| SCB vs.LIA   | No downgrade | No downgrade, MD=-0.60<br>95%CrI: -2.53 to 1.33                 | No downgrade                                                                                   | The treatment effect was not significantly based on the primary outcome | Undetectable by routine method.<br>The comparison-adjusted funnel plot for the network is not suggestive of any dominant publication bias | Low      |
| SSNB vs.LIA  | No downgrade | No downgrade, MD=-0.31<br>95%CrI: -1.77 to 1.14                 | No downgrade                                                                                   | The treatment effect was not significantly based on the primary outcome | Undetectable by routine method.<br>The comparison-adjusted funnel plot for the network is not suggestive of any dominant publication bias | Low      |
| CISB vs.LIA  | No downgrade | No downgrade, MD=-0.21<br>95%CrI: -1.54 to 1.12                 | No downgrade                                                                                   | The treatment effect was not significantly based on the primary outcome | Undetectable by routine method.<br>The comparison-adjusted funnel plot for the network is not suggestive of any dominant publication bias | Moderate |
| ISB vs.CISB  | No downgrade | No downgrade, MD=-0.31<br>95%CrI: -1.54 to 0.93                 | No downgrade                                                                                   | The treatment effect was not significantly based on the primary outcome | Undetectable by routine method.<br>The comparison-adjusted funnel plot for the network is not suggestive of any dominant publication bias | Moderate |

|               |                                                               |                                                                 |              |                                                                         |                                                                                                                                           |                                                  |
|---------------|---------------------------------------------------------------|-----------------------------------------------------------------|--------------|-------------------------------------------------------------------------|-------------------------------------------------------------------------------------------------------------------------------------------|--------------------------------------------------|
| SCB vs. CISB  | No downgrade                                                  | No downgrade, MD=-0.39<br>95%CrI: -2.17 to 1.42                 | No downgrade | The treatment effect was not significantly based on the primary outcome | Undetectable by routine method.<br>The comparison-adjusted funnel plot for the network is not suggestive of any dominant publication bias | Moderate                                         |
| SSNB vs. CISB | No downgrade                                                  | No downgrade MD=-0.11<br>95%CrI: -1.32 to 1.11                  | No downgrade | The treatment effect was not significantly based on the primary outcome | Undetectable by routine method.<br>The comparison-adjusted funnel plot for the network is not suggestive of any dominant publication bias | Low                                              |
| ISB vs. SSNB  | No downgrade                                                  | No downgrade, MD=-0.20<br>95%CrI: -0.85 to 0.45                 | No downgrade | The treatment effect was not significantly based on the primary outcome | Undetectable by routine method.<br>The comparison-adjusted funnel plot for the network is not suggestive of any dominant publication bias | Low                                              |
| SCB vs. SSNB  | No downgrade                                                  | No downgrade, MD=-0.29<br>95%CrI: -1.74 to 1.19                 | No downgrade | The treatment effect was not significantly based on the primary outcome | Undetectable by routine method.<br>The comparison-adjusted funnel plot for the network is not suggestive of any dominant publication bias | Low                                              |
| ISB vs. SCB   | No downgrade                                                  | No downgrade, MD=0.09<br>95%CrI: -1.24 to 1.38                  | No downgrade | The treatment effect was not significantly based on the primary outcome | Undetectable by routine method.<br>The comparison-adjusted funnel plot for the network is not suggestive of any dominant publication bias | Low                                              |
| SSNB vs. LIA  | No downgrade                                                  | Upgrade due to large effect, MD=-1.26<br>95%CrI: -2.39 to -0.10 | No downgrade | The treatment effect was not significantly based on the primary outcome | Undetectable by routine method.<br>The comparison-adjusted funnel plot for the network is not suggestive of any dominant publication bias | Low                                              |
| SSAX vs. LIA  | No downgrade                                                  | Upgrade due to large effect, MD=-1.10<br>95%CrI: -2.06 to -0.11 | No downgrade | The treatment effect was not significantly based on the primary outcome | Undetectable by routine method.<br>The comparison-adjusted funnel plot for the network is not suggestive of any dominant publication bias | Low                                              |
| CISB vs. LIA  | No downgrade                                                  | No downgrade, MD=-0.87<br>95%CrI: -1.90 to 0.18                 | No downgrade | The treatment effect was not significantly based on the primary outcome | Undetectable by routine method.<br>The comparison-adjusted funnel plot for the network is not suggestive of any dominant publication bias | Low                                              |
| ISB vs. LIA   | No downgrade                                                  | No downgrade, MD=-0.86<br>95%CrI: -1.76 to 0.06                 | No downgrade | The treatment effect was not significantly based on the primary outcome | Undetectable by routine method.<br>The comparison-adjusted funnel plot for the network is not suggestive of any dominant publication bias | Moderate                                         |
| SCB vs. LIA   | No downgrade                                                  | No downgrade, MD=-0.67<br>95%CrI: -1.85 to 0.54                 | No downgrade | The treatment effect was not significantly based on the primary outcome | Undetectable by routine method.<br>The comparison-adjusted funnel plot for the network is not suggestive of any dominant publication bias | Low                                              |
| CG vs. LIA    | No downgrade                                                  | No downgrade, MD=-0.32<br>95%CrI: -0.65 to 1.28                 | No downgrade | The treatment effect was not significantly based on the primary outcome | Undetectable by routine method.<br>The comparison-adjusted funnel plot for the network is not suggestive of any dominant publication bias | Low                                              |
| SSNB vs. CG   | No downgrade                                                  | No downgrade, MD=-0.94<br>95%CrI: -1.95 to 0.08                 | No downgrade | The treatment effect was not significantly based on the primary outcome | Undetectable by routine method.<br>The comparison-adjusted funnel plot for the network is not suggestive of any dominant publication bias | Low                                              |
| SSAX vs. CG   | No downgrade                                                  | No downgrade, MD=-0.78<br>95%CrI: -1.56 to 0.01                 | No downgrade | The treatment effect was not significantly based on the primary outcome | Undetectable by routine method.<br>The comparison-adjusted funnel plot for the network is not suggestive of any dominant publication bias | Low                                              |
| CISB vs. CG   | Downgrade due to concerns about Blinding of outcome assessors | No downgrade, MD=-0.55<br>95%CrI: -1.49 to 0.41                 | No downgrade | The treatment effect was not significantly based on the primary outcome | Undetectable by routine method.<br>The comparison-adjusted funnel plot for the network is not suggestive of any dominant publication bias | Very low<br>(Downgrade due to study limitations) |
| ISB vs. CG    | No downgrade                                                  | No downgrade, MD=-0.54<br>95%CrI: -1.27 to 0.21                 | No downgrade | The treatment effect was not significantly based on the primary outcome | Undetectable by routine method.<br>The comparison-adjusted funnel plot for the network is not suggestive of any dominant publication bias | Low                                              |

|               |              |                                                                   |              |                                                                         |                                                                                                                                           |     |
|---------------|--------------|-------------------------------------------------------------------|--------------|-------------------------------------------------------------------------|-------------------------------------------------------------------------------------------------------------------------------------------|-----|
| SCB vs. CG    | No downgrade | No downgrade, MD=-0.35<br>95%CrI: -1.42 to 0.73                   | No downgrade | The treatment effect was not significantly based on the primary outcome | Undetectable by routine method.<br>The comparison-adjusted funnel plot for the network is not suggestive of any dominant publication bias | Low |
| SSNB vs. SCB  | No downgrade | No downgrade, MD=-0.59<br>95%CrI: -1.71 to 0.49                   | No downgrade | The treatment effect was not significantly based on the primary outcome | Undetectable by routine method.<br>The comparison-adjusted funnel plot for the network is not suggestive of any dominant publication bias | Low |
| SSAX vs. SCB  | No downgrade | No downgrade, MD=-0.43<br>95%CrI: -1.38 to 0.52                   | No downgrade | The treatment effect was not significantly based on the primary outcome | Undetectable by routine method.<br>The comparison-adjusted funnel plot for the network is not suggestive of any dominant publication bias | Low |
| CISB vs. SCB  | No downgrade | No downgrade, MD=-0.20<br>95%CrI: -1.35 to 0.95                   | No downgrade | The treatment effect was not significantly based on the primary outcome | Undetectable by routine method.<br>The comparison-adjusted funnel plot for the network is not suggestive of any dominant publication bias | Low |
| ISB vs. SCB   | No downgrade | No downgrade, MD=-0.19<br>95%CrI: -1.06 to 0.68                   | No downgrade | The treatment effect was not significantly based on the primary outcome | Undetectable by routine method.<br>The comparison-adjusted funnel plot for the network is not suggestive of any dominant publication bias | Low |
| SSNB vs. ISB  | No downgrade | No downgrade, MD=-0.40<br>95%CrI: -1.11 to 0.31                   | No downgrade | The treatment effect was not significantly based on the primary outcome | Undetectable by routine method.<br>The comparison-adjusted funnel plot for the network is not suggestive of any dominant publication bias | Low |
| SSAX vs. ISB  | No downgrade | No downgrade, MD=-0.24<br>95%CrI: -0.78 to 0.31                   | No downgrade | The treatment effect was not significantly based on the primary outcome | Undetectable by routine method.<br>The comparison-adjusted funnel plot for the network is not suggestive of any dominant publication bias | Low |
| CISB vs. ISB  | No downgrade | No downgrade, MD=-0.01<br>95%CrI: -0.96 to 0.95                   | No downgrade | The treatment effect was not significantly based on the primary outcome | Undetectable by routine method.<br>The comparison-adjusted funnel plot for the network is not suggestive of any dominant publication bias | Low |
| SSNB vs. CISB | No downgrade | No downgrade, MD=-0.39<br>95%CrI: -1.57 to 0.79                   | No downgrade | The treatment effect was not significantly based on the primary outcome | Undetectable by routine method.<br>The comparison-adjusted funnel plot for the network is not suggestive of any dominant publication bias | Low |
| SSAX vs. CISB | No downgrade | No downgrade, MD=-0.22<br>95%CrI: -1.23 to 0.77                   | No downgrade | The treatment effect was not significantly based on the primary outcome | Undetectable by routine method.<br>The comparison-adjusted funnel plot for the network is not suggestive of any dominant publication bias | Low |
| SSNB vs. SSAX | No downgrade | No downgrade, MD=-0.16<br>95%CrI: -1.02 to 0.70                   | No downgrade | The treatment effect was not significantly based on the primary outcome | Undetectable by routine method.<br>The comparison-adjusted funnel plot for the network is not suggestive of any dominant publication bias | Low |
| SSAX vs. SCB  | No downgrade | No downgrade, MD=-0.40<br>95%CrI: -1.11 to 0.37                   | No downgrade | The treatment effect was not significantly based on the primary outcome | Undetectable by routine method.<br>The comparison-adjusted funnel plot for the network is not suggestive of any dominant publication bias | Low |
| ISB vs. CG    | No downgrade | Upgrade due to large effect, MD=-12.09<br>95%CrI: -17.15 to -7.08 | No downgrade | The treatment effect was not significantly based on the primary outcome | Undetectable by routine method.<br>The comparison-adjusted funnel plot for the network is not suggestive of any dominant publication bias | Low |
| SCB vs. CG    | No downgrade | Upgrade due to large effect, MD=-8.36<br>95%CrI: -15.48 to -1.33  | No downgrade | The treatment effect was not significantly based on the primary outcome | Undetectable by routine method.<br>The comparison-adjusted funnel plot for the network is not suggestive of any dominant publication bias | Low |
| SSNB vs. CG   | No downgrade | Upgrade due to large effect, MD=-7.15<br>95%CrI: -12.20 to -2.15  | No downgrade | The treatment effect was not significantly based on the primary outcome | Undetectable by routine method.<br>The comparison-adjusted funnel plot for the network is not suggestive of any dominant publication bias | Low |

|               |              |                                                                  |              |                                                                         |                                                                                                                                           |     |
|---------------|--------------|------------------------------------------------------------------|--------------|-------------------------------------------------------------------------|-------------------------------------------------------------------------------------------------------------------------------------------|-----|
| SSAX vs. CG   | No downgrade | Upgrade due to large effect, MD=-6.45<br>95%CrI: -13.82 to -0.90 | No downgrade | The treatment effect was not significantly based on the primary outcome | Undetectable by routine method.<br>The comparison-adjusted funnel plot for the network is not suggestive of any dominant publication bias | Low |
| CISB vs. CG   | No downgrade | No downgrade, MD=-5.74<br>95%CrI: -14.31 to 2.82                 | No downgrade | The treatment effect was not significantly based on the primary outcome | Undetectable by routine method.<br>The comparison-adjusted funnel plot for the network is not suggestive of any dominant publication bias | Low |
| LIA vs. CG    | No downgrade | No downgrade, MD=-3.61<br>95%CrI: -9.19 to 1.95                  | No downgrade | The treatment effect was not significantly based on the primary outcome | Undetectable by routine method.<br>The comparison-adjusted funnel plot for the network is not suggestive of any dominant publication bias | Low |
| ISB vs. LIA   | No downgrade | No downgrade, MD=-8.48<br>95%CrI: -13.11 to -3.85                | No downgrade | The treatment effect was not significantly based on the primary outcome | Undetectable by routine method.<br>The comparison-adjusted funnel plot for the network is not suggestive of any dominant publication bias | Low |
| SCB vs. LIA   | No downgrade | No downgrade, MD=-4.76<br>95%CrI: -11.58 to 2.11                 | No downgrade | The treatment effect was not significantly based on the primary outcome | Undetectable by routine method.<br>The comparison-adjusted funnel plot for the network is not suggestive of any dominant publication bias | Low |
| SSNB vs. LIA  | No downgrade | No downgrade, MD=-3.55<br>95%CrI: -8.69 to 1.63                  | No downgrade | The treatment effect was not significantly based on the primary outcome | Undetectable by routine method.<br>The comparison-adjusted funnel plot for the network is not suggestive of any dominant publication bias | Low |
| SSAX vs. LIA  | No downgrade | No downgrade, MD=-2.85<br>95%CrI: -9.92 to 4.22                  | No downgrade | The treatment effect was not significantly based on the primary outcome | Undetectable by routine method.<br>The comparison-adjusted funnel plot for the network is not suggestive of any dominant publication bias | Low |
| CISB vs. LIA  | No downgrade | No downgrade, MD=-2.13<br>95%CrI: -8.62 to 4.37                  | No downgrade | The treatment effect was not significantly based on the primary outcome | Undetectable by routine method.<br>The comparison-adjusted funnel plot for the network is not suggestive of any dominant publication bias | Low |
| ISB vs. CISB  | No downgrade | No downgrade, MD=-6.35<br>95%CrI: -14.31 to 1.62                 | No downgrade | The treatment effect was not significantly based on the primary outcome | Undetectable by routine method.<br>The comparison-adjusted funnel plot for the network is not suggestive of any dominant publication bias | Low |
| SCB vs. CISB  | No downgrade | No downgrade, MD=-2.63<br>95%CrI: -12.05 to 6.80                 | No downgrade | The treatment effect was not significantly based on the primary outcome | Undetectable by routine method.<br>The comparison-adjusted funnel plot for the network is not suggestive of any dominant publication bias | Low |
| SSNB vs. CISB | No downgrade | No downgrade, MD=-1.41<br>95%CrI: -9.67 to 6.89                  | No downgrade | The treatment effect was not significantly based on the primary outcome | Undetectable by routine method.<br>The comparison-adjusted funnel plot for the network is not suggestive of any dominant publication bias | Low |
| SSAX vs. CISB | No downgrade | No downgrade, MD=-0.71<br>95%CrI: -10.31 to 8.86                 | No downgrade | The treatment effect was not significantly based on the primary outcome | Undetectable by routine method.<br>The comparison-adjusted funnel plot for the network is not suggestive of any dominant publication bias | Low |
| ISB vs. SSAX  | No downgrade | No downgrade, MD=-5.64<br>95%CrI: -10.97 to -0.30                | No downgrade | The treatment effect was not significantly based on the primary outcome | Undetectable by routine method.<br>The comparison-adjusted funnel plot for the network is not suggestive of any dominant publication bias | Low |
| SCB vs. SSAX  | No downgrade | No downgrade, MD=-1.91<br>95%CrI: -9.40 to 5.61                  | No downgrade | The treatment effect was not significantly based on the primary outcome | Undetectable by routine method.<br>The comparison-adjusted funnel plot for the network is not suggestive of any dominant publication bias | Low |
| SSNB vs. SSAX | No downgrade | No downgrade, MD=-0.70<br>95%CrI: -7.23 to 5.85                  | No downgrade | The treatment effect was not significantly based on the primary outcome | Undetectable by routine method.<br>The comparison-adjusted funnel plot for the network is not suggestive of any dominant publication bias | Low |

|              |              |                                                  |              |                                                                         |                                                                                                                                           |     |
|--------------|--------------|--------------------------------------------------|--------------|-------------------------------------------------------------------------|-------------------------------------------------------------------------------------------------------------------------------------------|-----|
| ISB vs. SSNB | No downgrade | No downgrade, MD=-4.94<br>95%CrI: -8.70 to -1.19 | No downgrade | The treatment effect was not significantly based on the primary outcome | Undetectable by routine method.<br>The comparison-adjusted funnel plot for the network is not suggestive of any dominant publication bias | Low |
| SCB vs. SSNB | No downgrade | No downgrade, MD=-1.21<br>95%CrI: -7.11 to 4.71  | No downgrade | The treatment effect was not significantly based on the primary outcome | Undetectable by routine method.<br>The comparison-adjusted funnel plot for the network is not suggestive of any dominant publication bias | Low |
| ISB vs. SCB  | No downgrade | No downgrade, MD=-3.73<br>95%CrI: -9.00 to 1.53  | No downgrade | The treatment effect was not significantly based on the primary outcome | Undetectable by routine method.<br>The comparison-adjusted funnel plot for the network is not suggestive of any dominant publication bias | Low |
